# Supplementary material
Source: HighWire-hosted journal article supplement (http://dmd.aspetjournals.org/highwire/filestream/69932/field_highwire_adjunct_files/0/Supplemental_77552.pdf)
Supplement: Supplemental_77552.pdf [file Supplemental_77552.pdf]

# Species-specific involvement of aldehyde oxidase and xanthine oxidase in the metabolism of the pyrimidine-containing mGlu<sub>5</sub> negative allosteric modulator VU0424238 (auglurant)

Rachel D. Crouch, Annie L. Blobaum, Andrew S. Felts, P. Jeffrey Conn and Craig W. Lindsley

Drug Metabolism and Disposition

## Supplemental Information

### Supplemental Figure 1.

Proton NMR spectra for VU0652922 (M1). NMR spectra were recorded on a 400 MHz AMX Bruker NMR spectrometer.

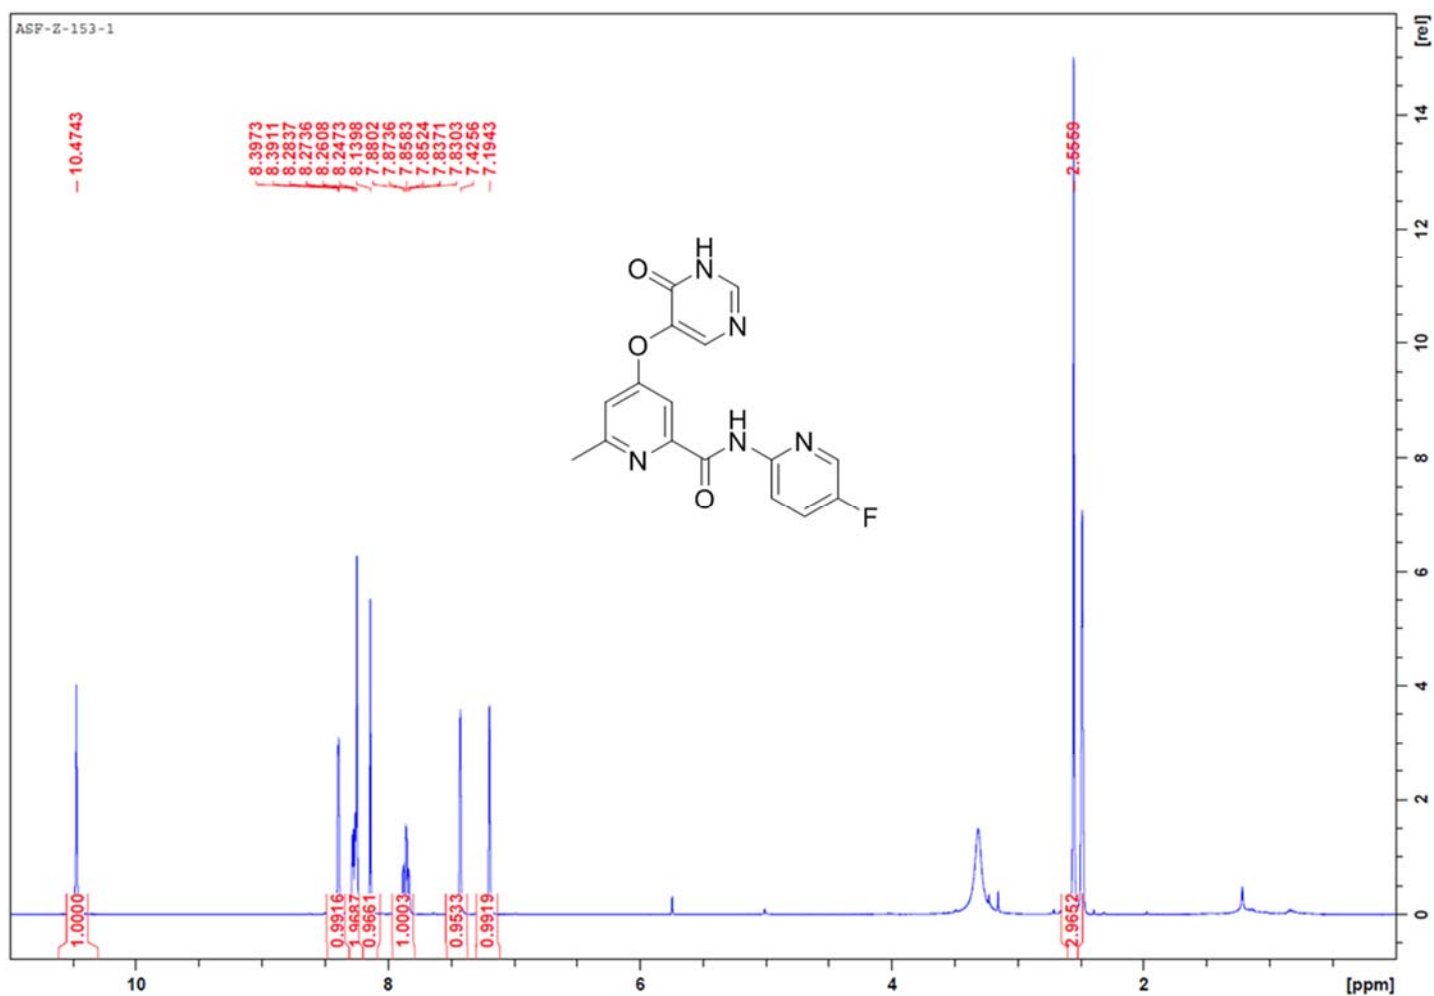

## Supplemental Figure 2.

Extracted ion chromatograms (XIC) obtained from extracts of incubations with VU238 (5  $\mu$ M) in (A) mixed gender human hepatic S9 (2 mg/mL), (B) male rhesus monkey hepatic S9 (2 mg/mL), (C) male mouse hepatic S9 (2 mg/mL), (D) male guinea pig hepatic S9 (2 mg/mL), and (E) male minipig hepatic S9 (2mg/mL) demonstrating formation of M1 and M2 in the presence or absence of the XO inhibitor allopurinol (100  $\mu$ M) or the AO inhibitor hydralazine (50  $\mu$ M).

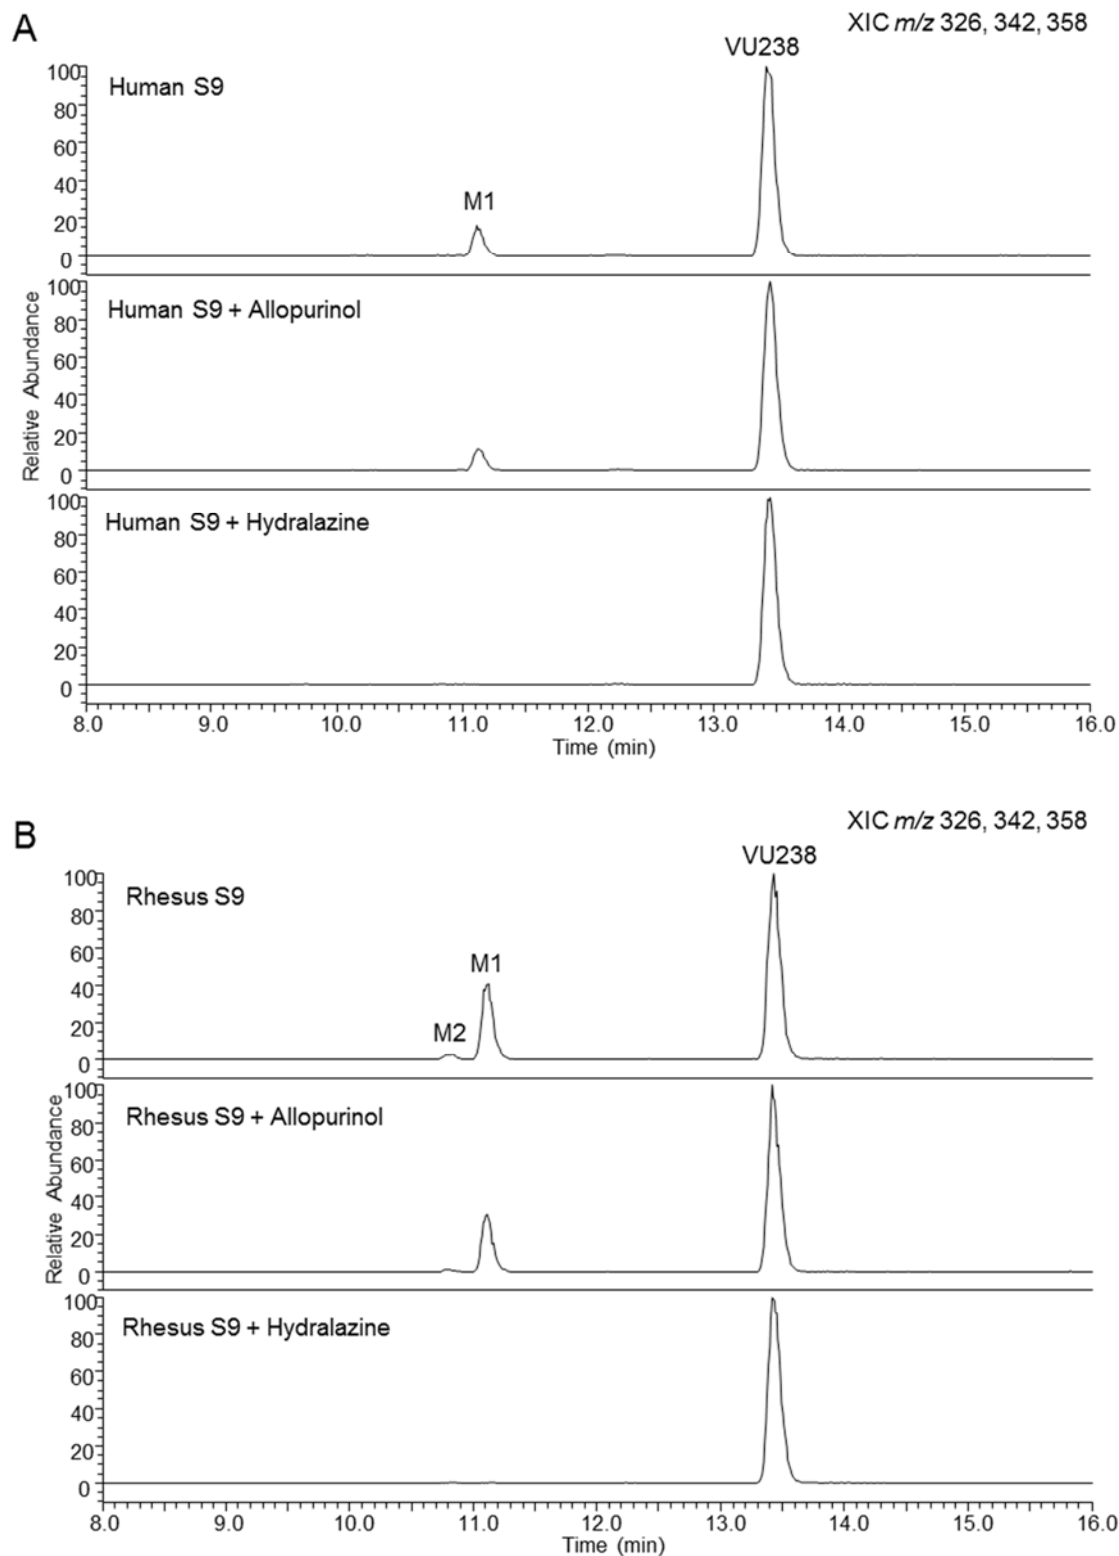

C

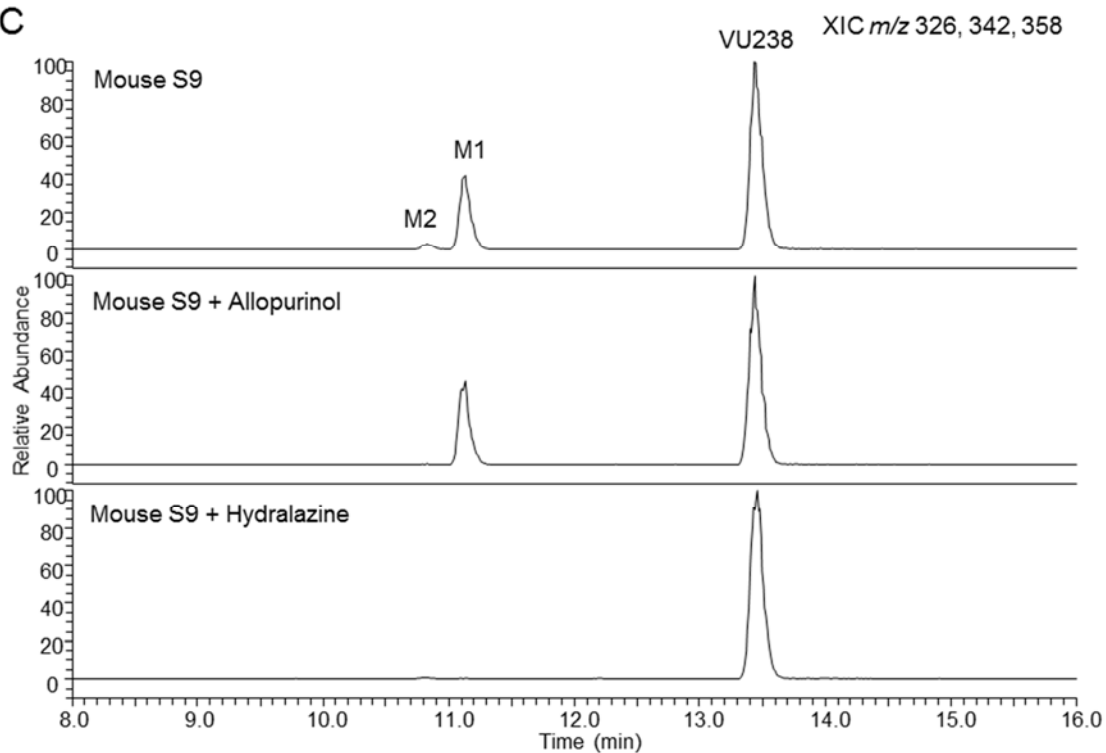

D

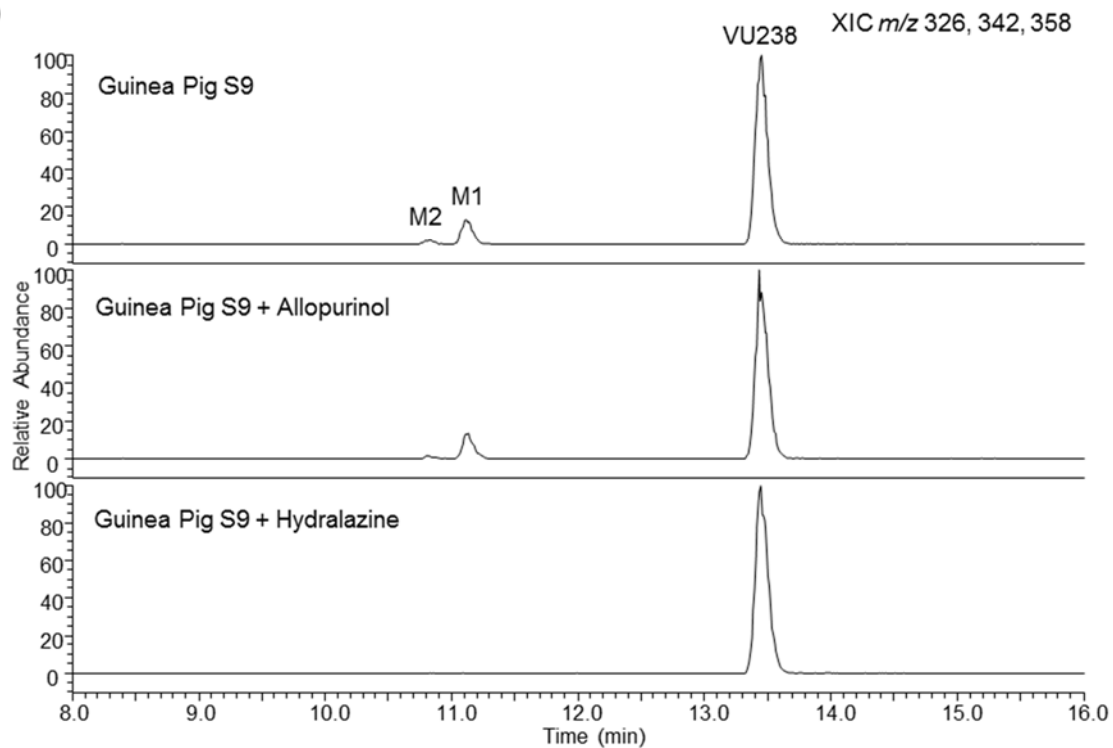

**F**

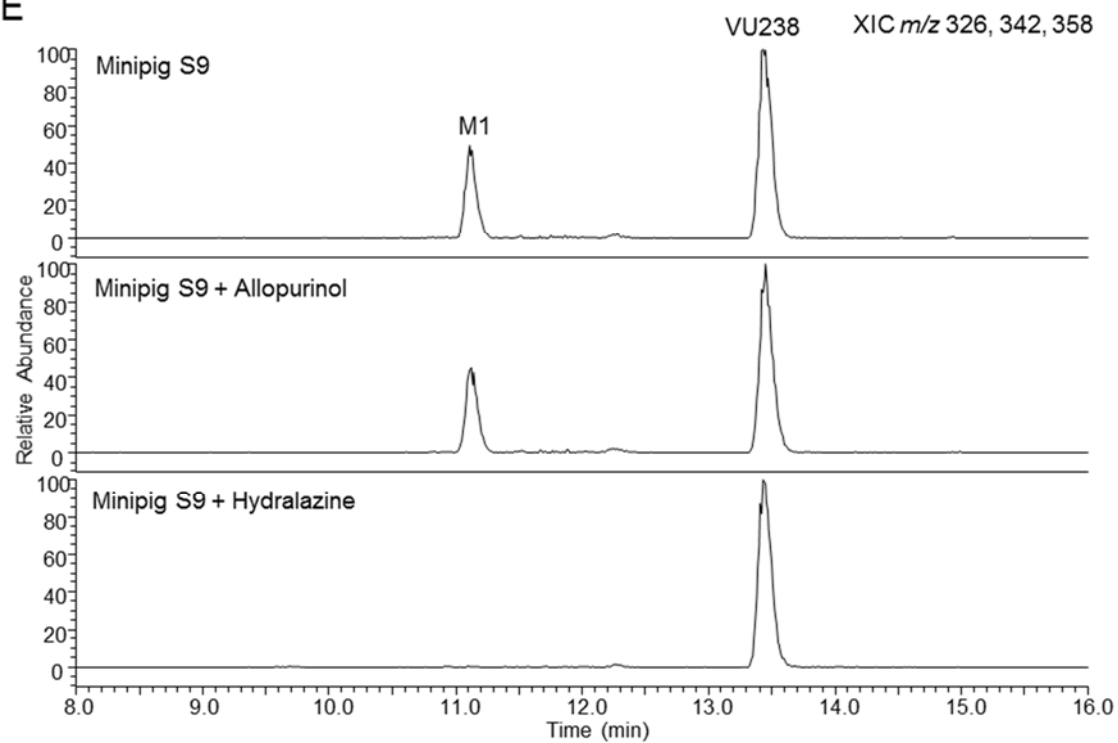

### Supplemental Figure 3.

Extracted ion chromatograms (XIC) obtained from extracts of incubations with VU922 (5  $\mu$ M) in (A) mixed gender human hepatic S9 (2 mg/mL), (B) male rhesus monkey hepatic S9 (2 mg/mL), (C) male mouse hepatic S9 (2 mg/mL), (D) male guinea pig hepatic S9 (2 mg/mL), and (E) male minipig hepatic S9 (2mg/mL) demonstrating formation of M2 in the presence or absence of the XO inhibitor allopurinol (100  $\mu$ M) or the AO inhibitor hydralazine (50  $\mu$ M).

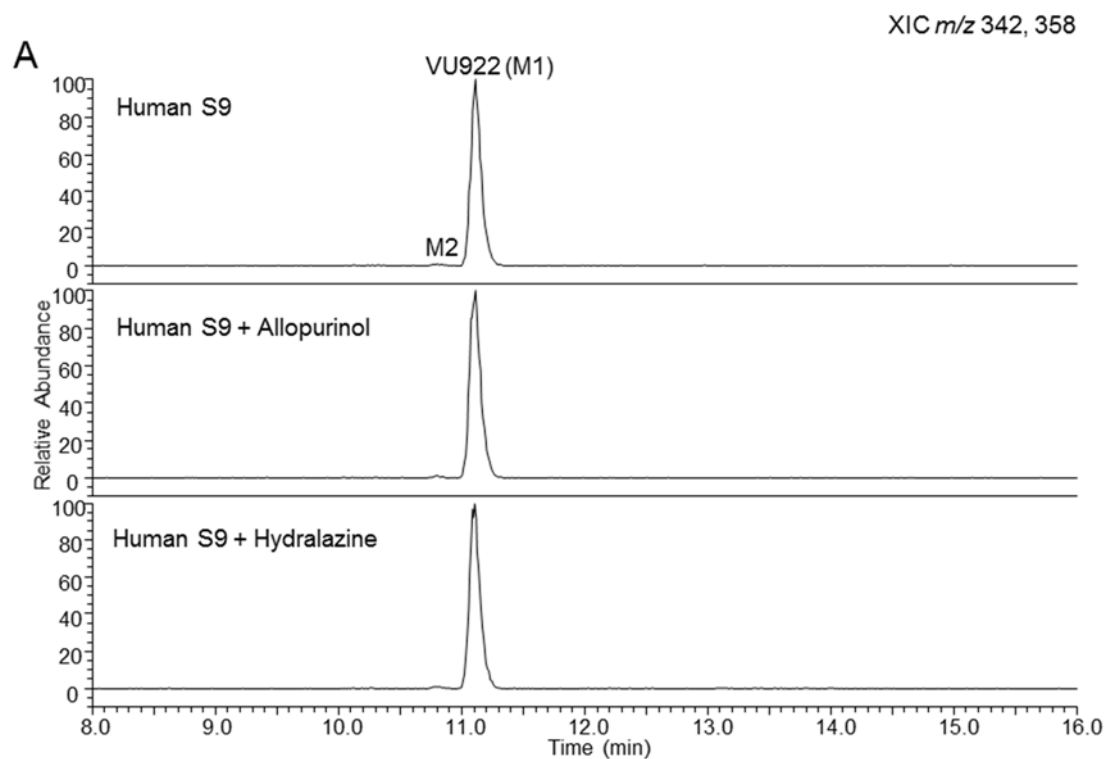

XIC  $m/z$  342, 358

**B**

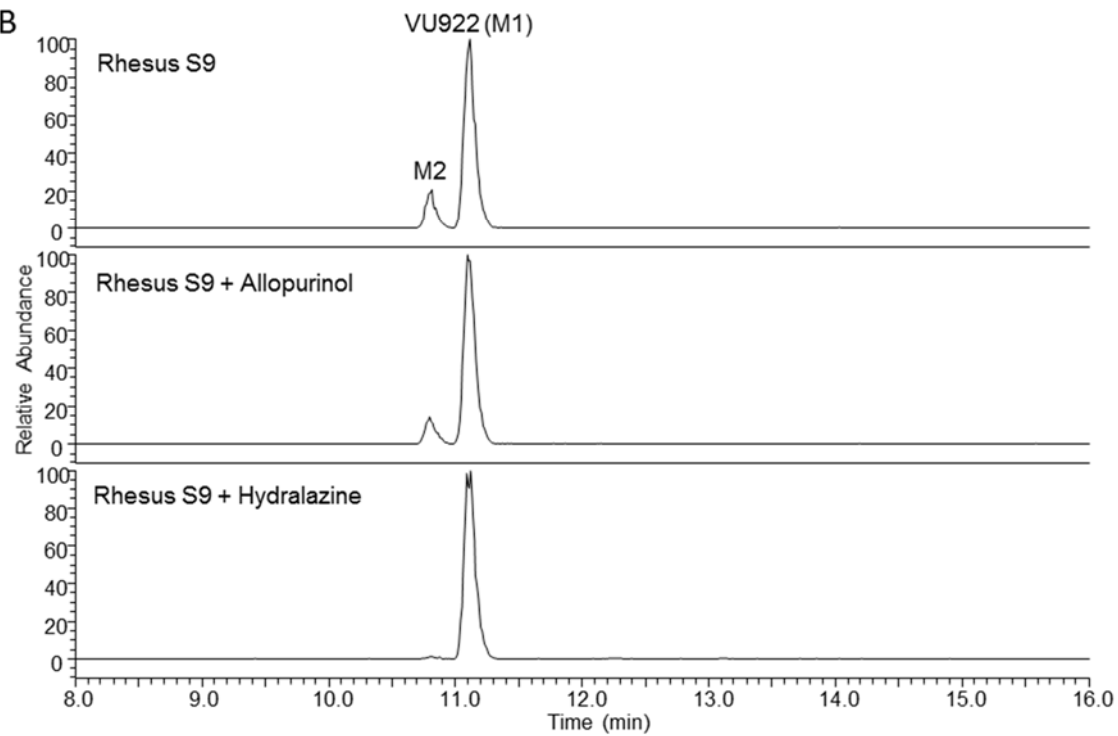

XIC  $m/z$  342, 358

**C**

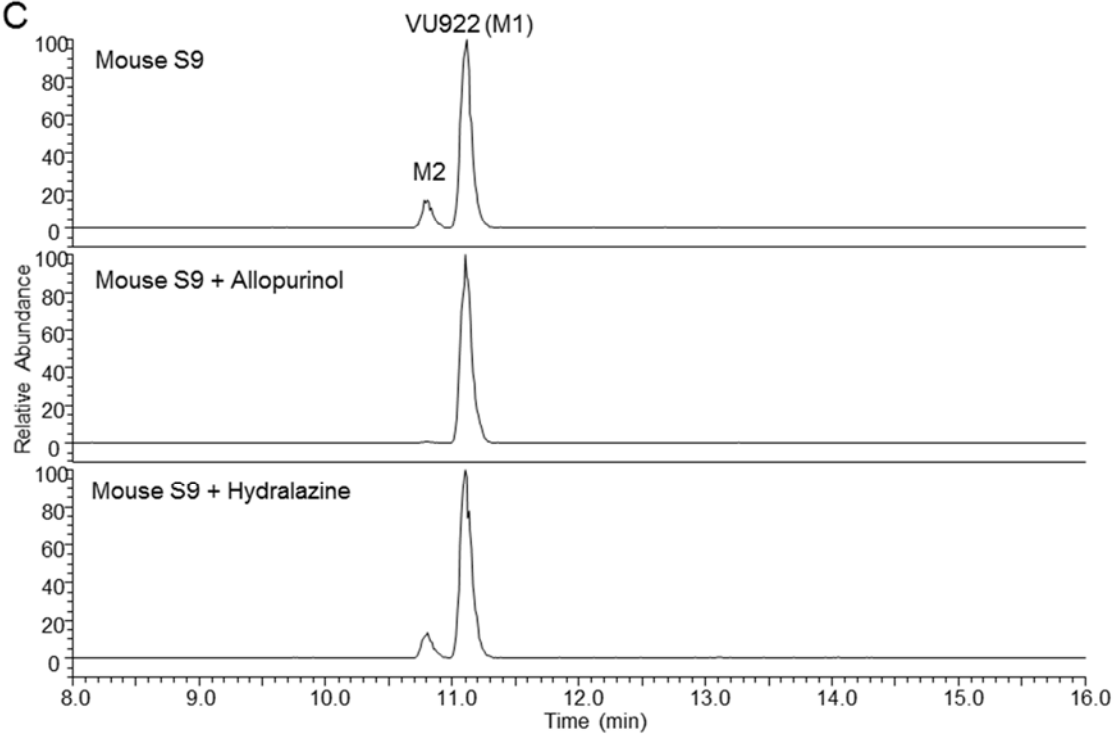

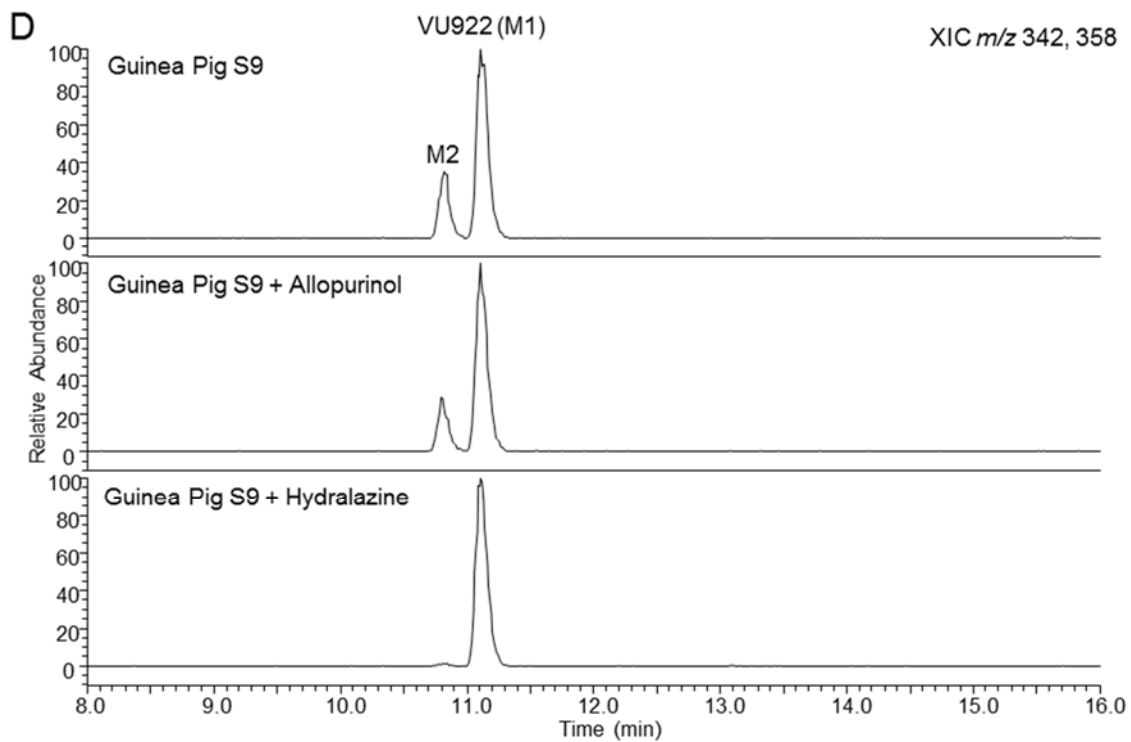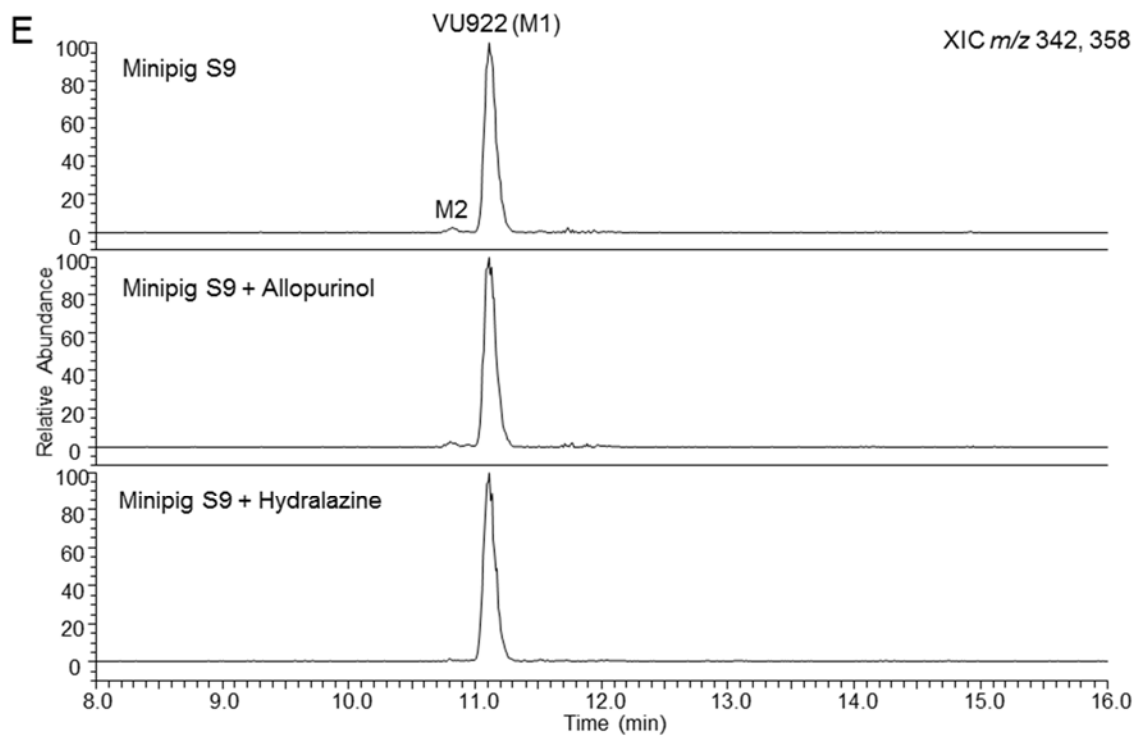

### Supplemental Figure 4.

Extracted ion chromatograms (XIC) obtained from extracts of incubations with BIBX1382 (5  $\mu$ M) in (A) mixed gender human hepatic S9 (2 mg/mL), (B) male rhesus monkey hepatic S9 (2 mg/mL), (C) male mouse hepatic S9 (2 mg/mL), (D) male guinea pig hepatic S9 (2 mg/mL), and (E) male minipig hepatic S9 (2mg/mL) demonstrating formation of M1b and M2b in the presence or absence of the XO inhibitor allopurinol (100  $\mu$ M) or the AO inhibitor hydralazine (50  $\mu$ M).

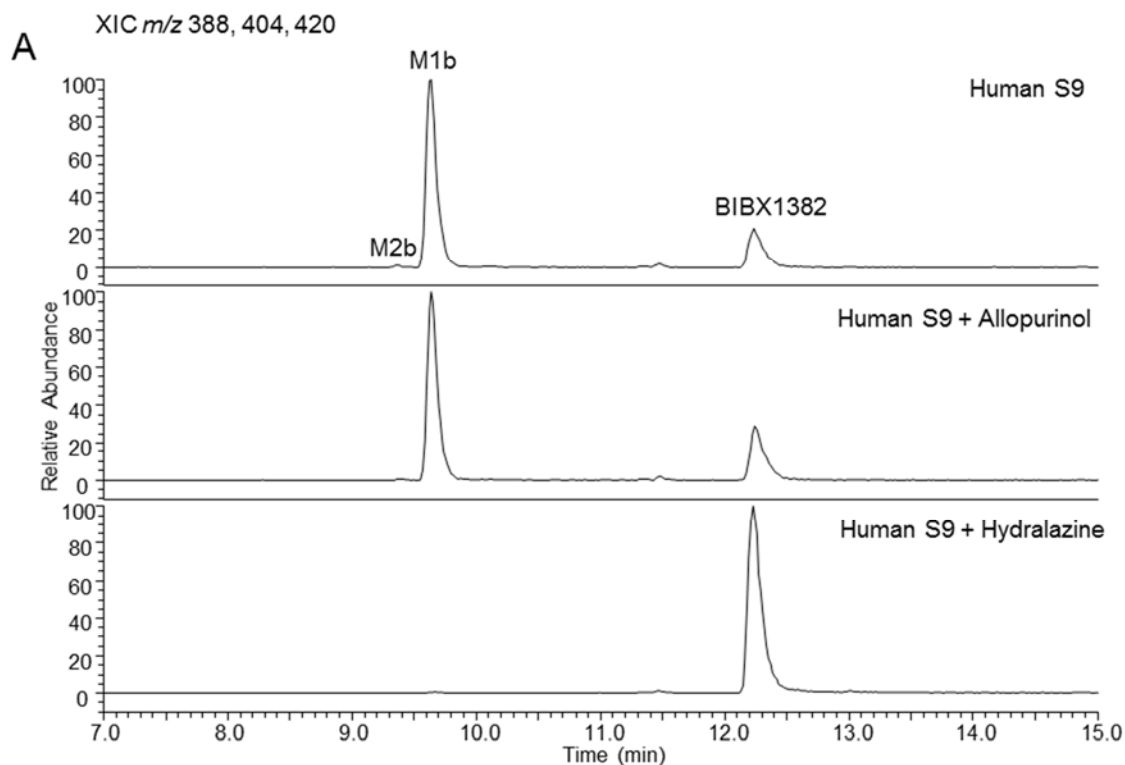



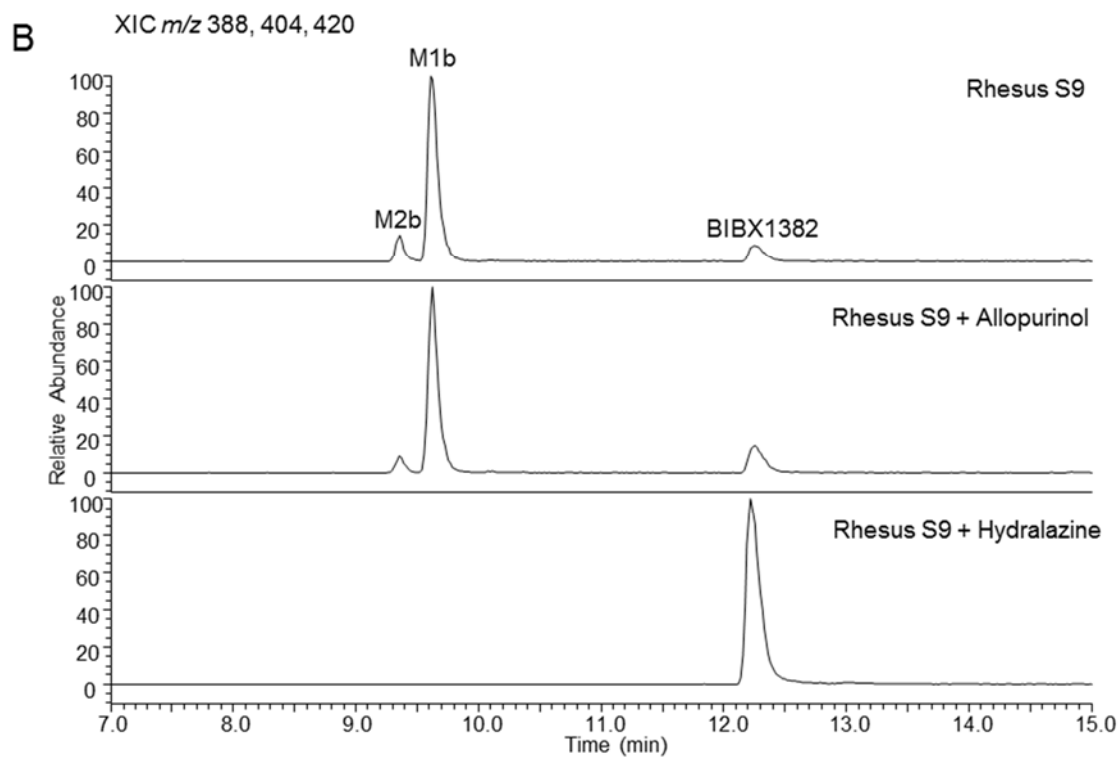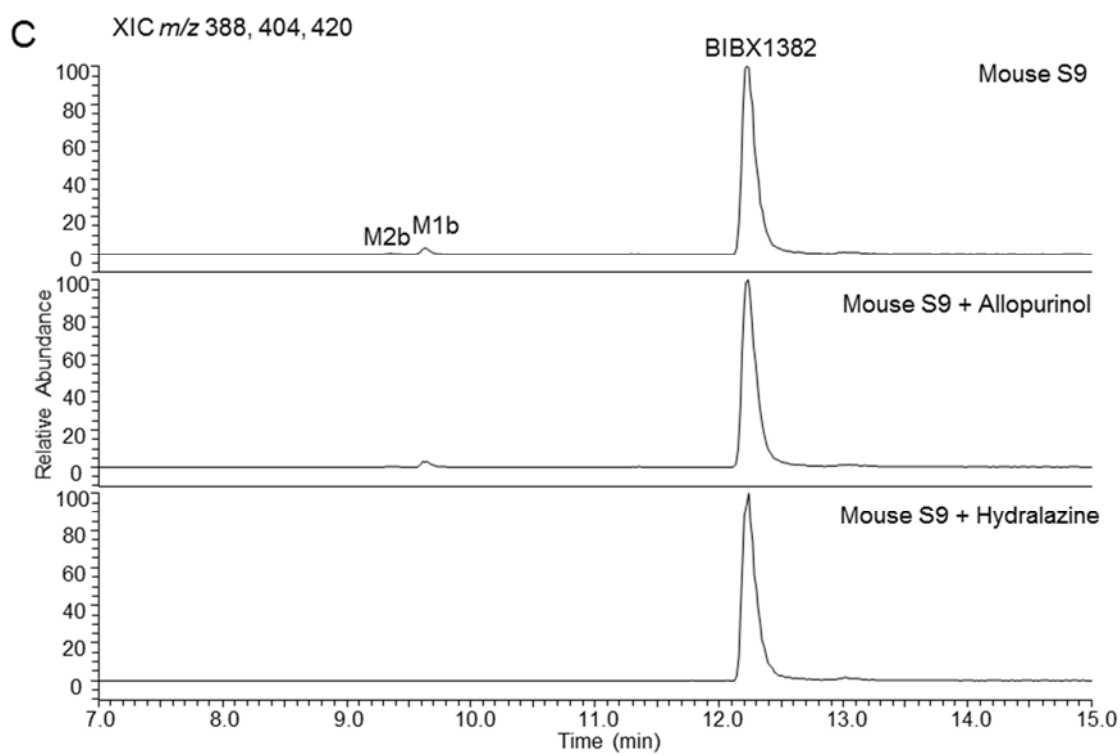

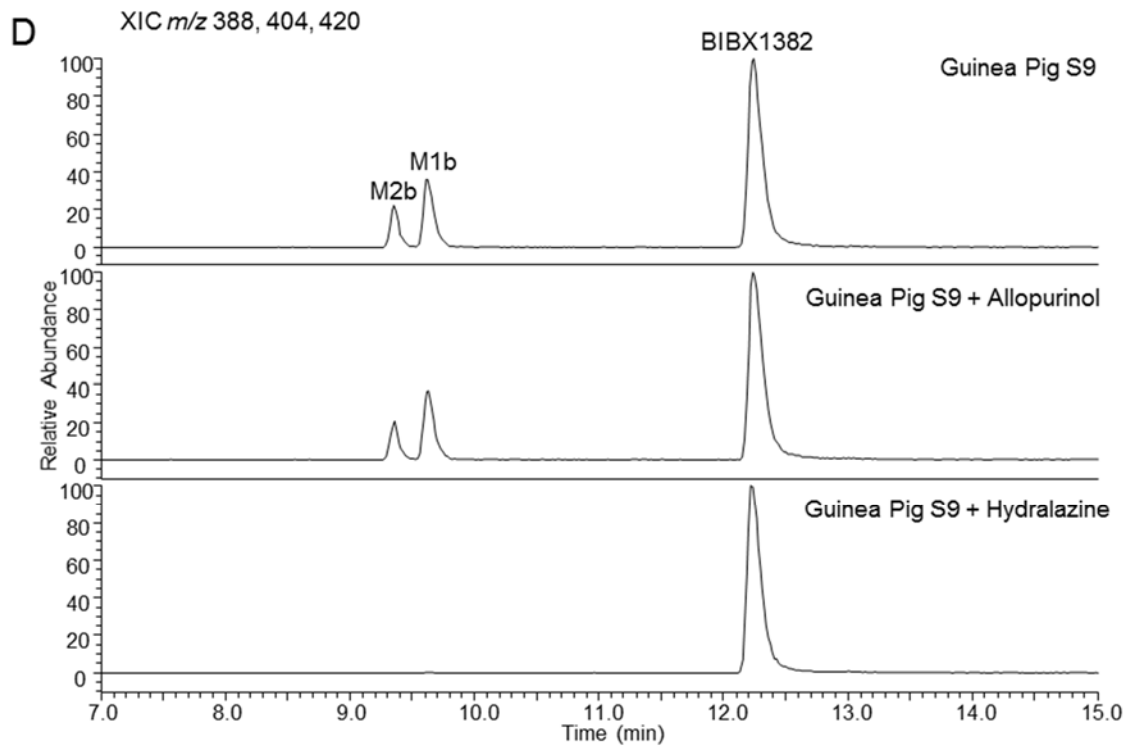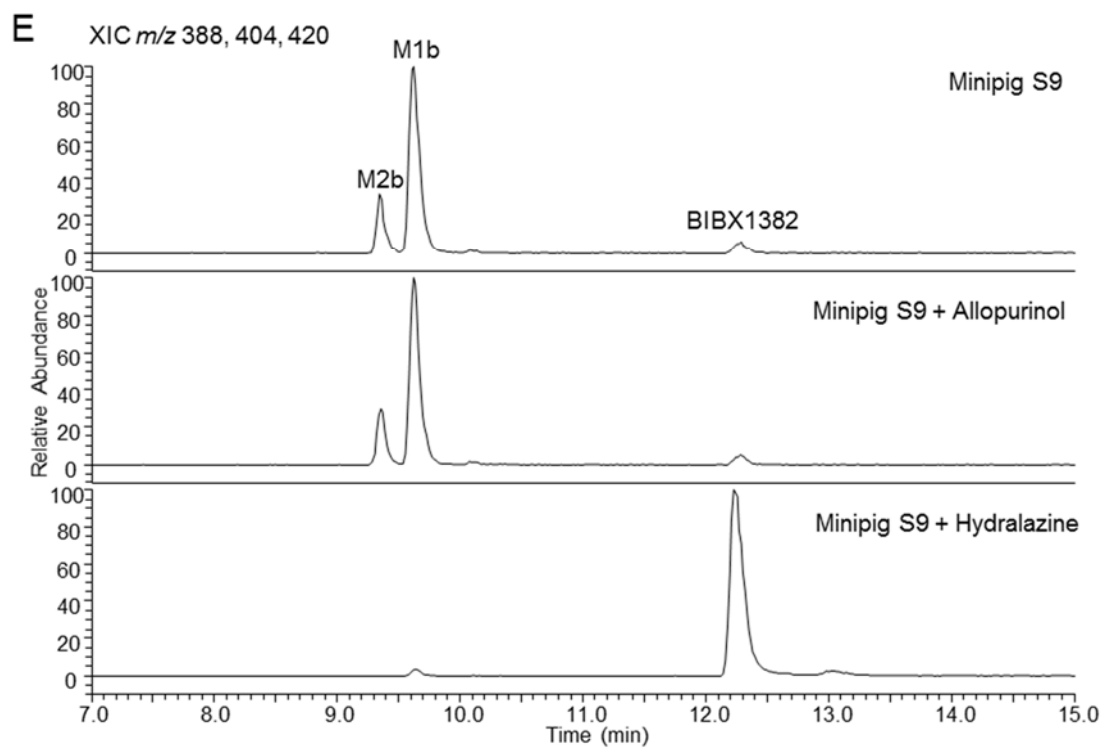

**Supplemental Table 1.**

Percent total MS peak area of parent drug and metabolites from biotransformation experiments with VU238, VU922, or BIBX1382 (5  $\mu$ M) in hepatic S9 of multiple species (2 mg/mL) in the presence or absence of the XO inhibitor allopurinol (100  $\mu$ M) or the AO inhibitor hydralazine (50  $\mu$ M).

|                                 |             | <b>VU238</b> |       |       | <b>VU922 (M1)</b> |       | <b>BIBX1382</b> |       |       |
|---------------------------------|-------------|--------------|-------|-------|-------------------|-------|-----------------|-------|-------|
|                                 |             | VU238        | M1    | M2    | M1                | M2    | BIBX1382        | M1b   | M2b   |
| <b>Human</b>                    | Control     | 88.8%        | 11.2% | ND    | 99.4%             | 0.6%  | 22.1%           | 77.2% | 0.7%  |
|                                 | Allopurinol | 91.1%        | 8.9%  | ND    | 99.3%             | 0.7%  | 28.5%           | 71.1% | 0.5%  |
|                                 | Hydralazine | 100%         | ND    | ND    | >99%              | n/d   | 99.8%           | 0.2%  | ND    |
| <b>Cynomolgus Monkey</b>        | Control     | 43.6%        | 48.5% | 7.9%  | 70.9%             | 29.1% | 2.1%            | 78.6% | 19.3% |
|                                 | Allopurinol | 51.0%        | 43.4% | 5.7%  | 76.6%             | 23.4% | 2.7%            | 82.5% | 14.8% |
|                                 | Hydralazine | 100%         | ND    | ND    | 100%              | ND    | 100%            | ND    | ND    |
| <b>Rhesus Monkey</b>            | Control     | 71.4%        | 26.9% | 1.7%  | 84.6%             | 15.4% | 10.5%           | 80.2% | 9.3%  |
|                                 | Allopurinol | 76.9%        | 22.3% | 0.8%  | 88.8%             | 11.2% | 17.3%           | 76.5% | 6.2%  |
|                                 | Hydralazine | >99%         | ND    | n/d   | >98%              | n/d   | 100%            | ND    | ND    |
| <b>Rat</b>                      | Control     | 41.4%        | 47.3% | 11.3% | 70.2%             | 29.8% | 95.4%           | 1.2%  | 3.4%  |
|                                 | Allopurinol | 44.0%        | 55.1% | 0.9%  | 96.8%             | 3.2%  | 95.8%           | 1.3%  | 2.9%  |
|                                 | Hydralazine | >99%         | ND    | n/d   | 74.2%             | 25.8% | 100%            | ND    | ND    |
| <b>Mouse</b>                    | Control     | 72.2%        | 26.1% | 1.7%  | 87.7%             | 12.3% | 97.5%           | 2.2%  | 0.3%  |
|                                 | Allopurinol | 70.9%        | 29.1% | ND    | 99.4%             | 0.6%  | 97.6%           | 2.1%  | 0.3%  |
|                                 | Hydralazine | >99%         | ND    | n/d   | 89.0%             | 11.0% | 100%            | ND    | ND    |
| <b>Guinea Pig</b>               | Control     | 87.7%        | 10.7% | 1.7%  | 75.9%             | 24.1% | 71.8%           | 18.8% | 9.4%  |
|                                 | Allopurinol | 88.0%        | 11.1% | 0.9%  | 79.6%             | 20.4% | 72.4%           | 19.0% | 8.5%  |
|                                 | Hydralazine | 100%         | ND    | ND    | >98%              | n/d   | 99.9%           | 0.1%  | ND    |
| <b>Minipig</b>                  | Control     | 71.2%        | 28.8% | ND    | 98.3%             | 1.7%  | 5.6%            | 75.6% | 18.8% |
|                                 | Allopurinol | 70.4%        | 29.6% | ND    | 98.0%             | 2.0%  | 5.2%            | 75.4% | 19.4% |
|                                 | Hydralazine | 100%         | ND    | ND    | >99%              | n/d   | 97.5%           | 2.5%  | ND    |
| <b>Female Cynomolgus Monkey</b> | Control     | 89.3%        | 10.7% | ND    | 95.9%             | 4.1%  | n/a             | n/a   | n/a   |
|                                 | Allopurinol | 92.7%        | 7.3%  | ND    | 97.1%             | 2.9%  | n/a             | n/a   | n/a   |
|                                 | Hydralazine | >99%         | ND    | n/d   | >99%              | n/d   | n/a             | n/a   | n/a   |
| <b>Female Rat</b>               | Control     | 97.2%        | 2.8%  | ND    | 83.1%             | 16.9% | n/a             | n/a   | n/a   |
|                                 | Allopurinol | 96.7%        | 3.3%  | ND    | 100%              | ND    | n/a             | n/a   | n/a   |
|                                 | Hydralazine | >99%         | ND    | n/d   | 84.2%             | 15.8% | n/a             | n/a   | n/a   |

ND = not detected

n/d = not determined due to presence of interfering analyte

n/a = no data available

### Supplemental Figure 5.

UV chromatograms obtained from extracts of 60-minute incubations with 6-thioxanthine (6-TX, 20  $\mu$ M) in (A) male cynomolgus monkey hepatic S9 (2 mg/mL), (B) male rat hepatic S9 (2 mg/mL), (C) mixed gender human hepatic S9 (2 mg/mL), (D) male rhesus monkey hepatic S9 (2 mg/mL), (E) male mouse hepatic S9 (2mg/mL), (F) male guinea pig hepatic S9 (2mg/mL), and (G) male minipig hepatic S9 (2mg/mL) demonstrating formation of 6-thiouric acid (6-TUA) in the presence or absence of the XO inhibitor allopurinol (100  $\mu$ M) or the AO inhibitor hydralazine (50  $\mu$ M). Chromatograms depicted represent extracted UV plots of spectrum maximums at 340 nm (6-TX) and 354 nm (6-TUA).

**LC/UV/MS analysis of 6-TX and 6-TUA.** Incubations were carried out as described in the materials and methods section. LC/UV/MS analysis of 6-TX and 6-TUA was performed with an Agilent 1290 Infinity HPLC system coupled to a LTQ XL ion trap mass spectrometer (ThermoFisher Scientific, Waltham, MA). Analytes were separated by gradient elution using a Zorbax Eclipse XDB C18 column (5  $\mu$ m, 4.6  $\times$  150 mm; Agilent Technologies). Solvent A was 0.1% formic acid in water (pH unadjusted), and solvent B was acetonitrile. The initial mobile phase was held at 95:5 A-B (v/v) for 5.5 minutes and by linear gradient was transitioned to 20:80 A-B over 1.5 minutes, held for 2 minutes, then transitioned back to starting conditions over 0.5 minutes for a total run time of 10 min. The flow rate was 0.800 ml/min. The HPLC eluent was first introduced into an Agilent 1290 diode array detector (spectrum scan 190 – 400 nm) followed by electrospray ionization-assisted introduction into a LTQ XL ion trap mass spectrometer operated in positive ionization mode. Ionization was assisted with sheath and auxiliary gas (ultra-pure nitrogen) set at 50 and 20 psi, respectively. The electrospray voltage was set at 5 kV with the heated ion transfer capillary set at 350  $^{\circ}$ C and 31 V. Data were analyzed using Thermo XCalibur 2.2 software. LC/UV/MS/MS analysis of analytes identified as 6-TX and 6-TUA are consistent with that of authentic standards of 6-TX and 6-TUA, respectively (data not shown).

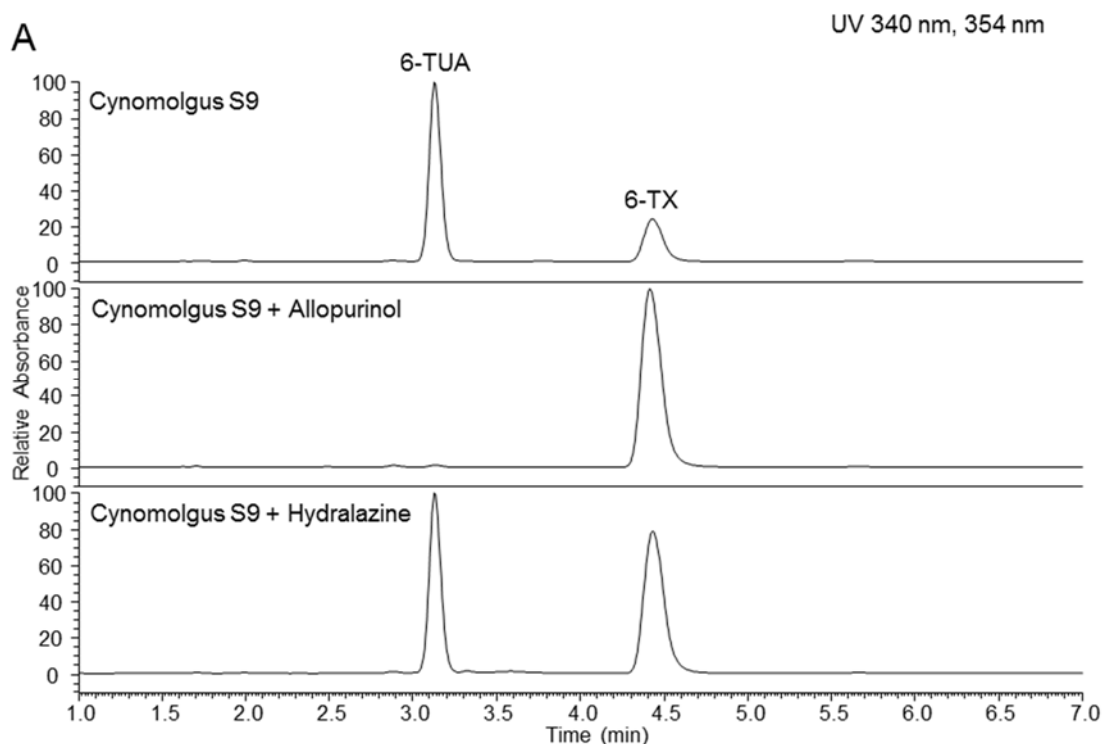

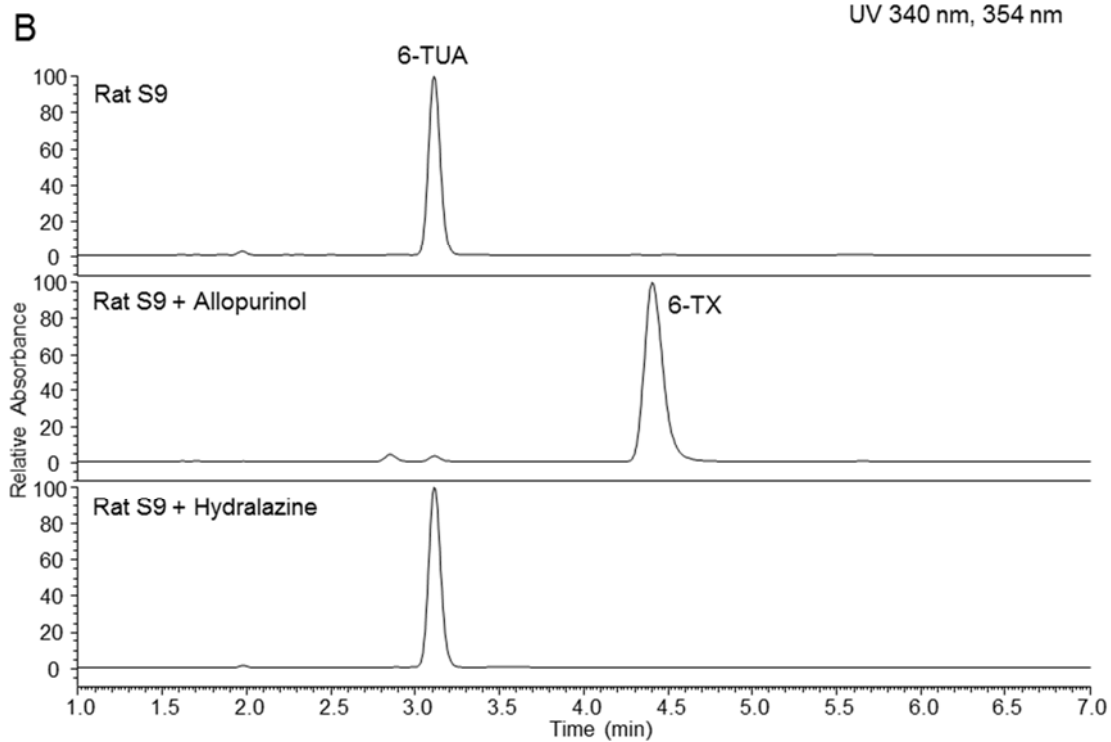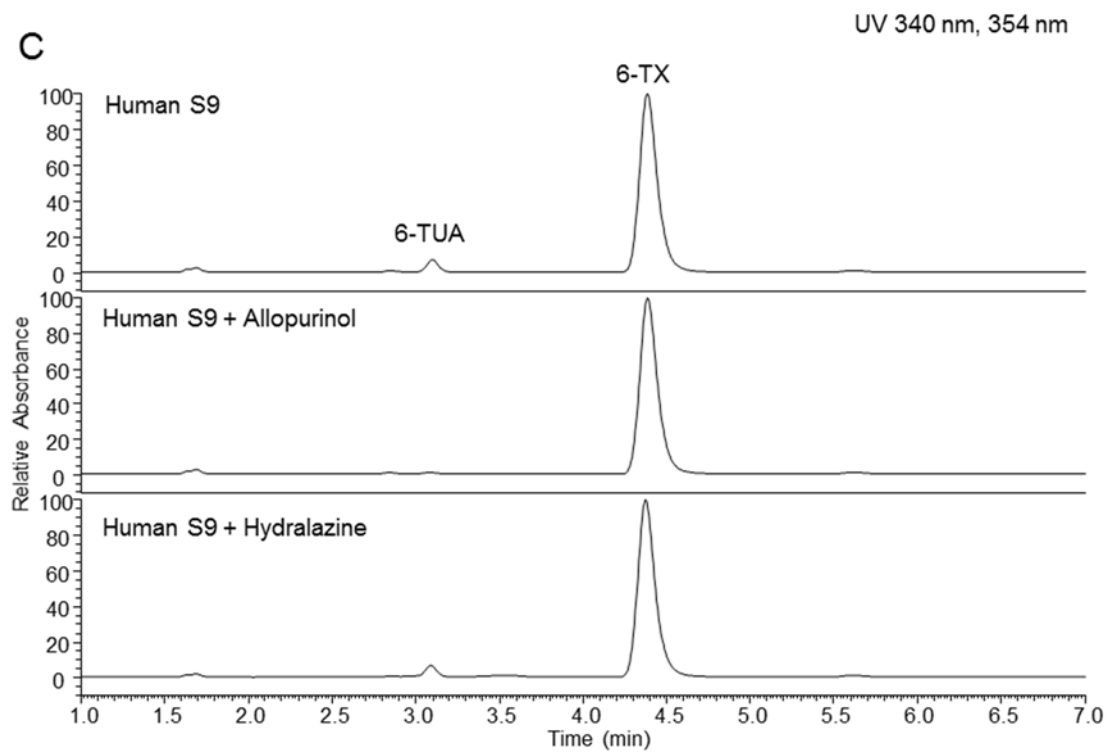

**D**

UV 340 nm, 354 nm

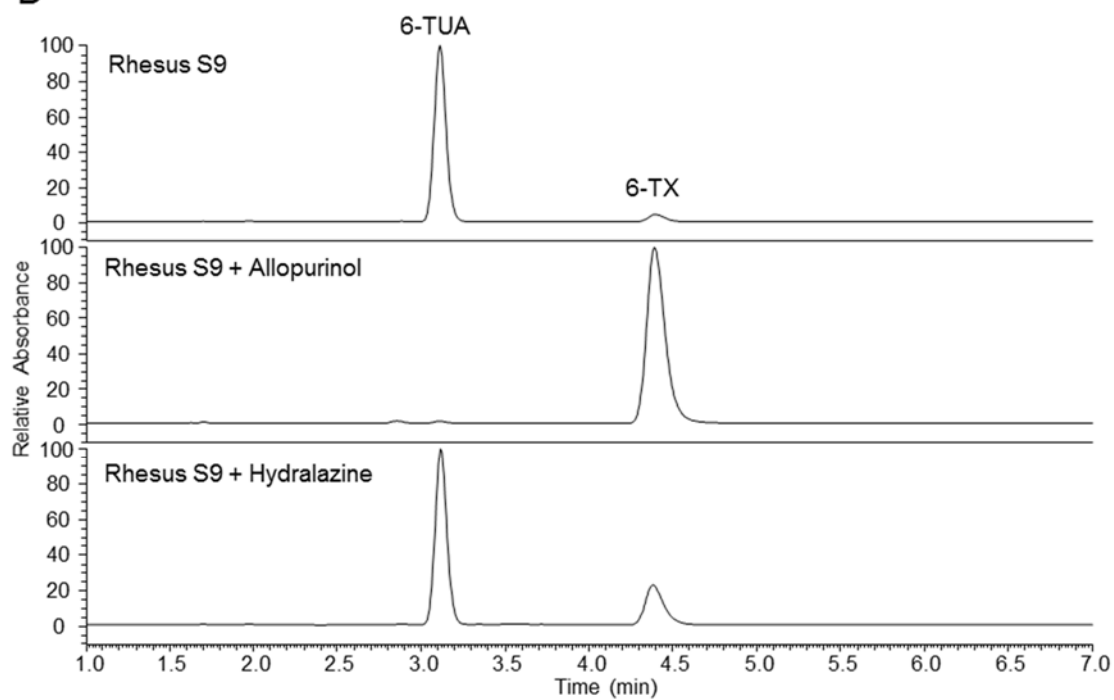**E**

UV 340 nm, 354 nm

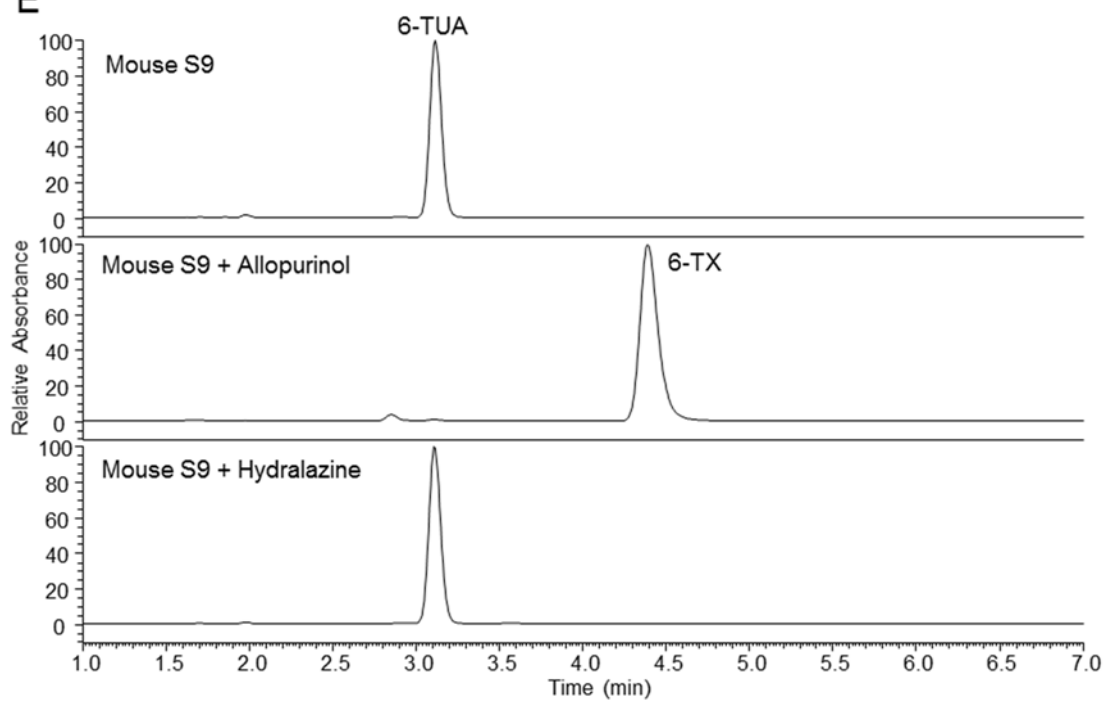

UV 340 nm, 354 nm

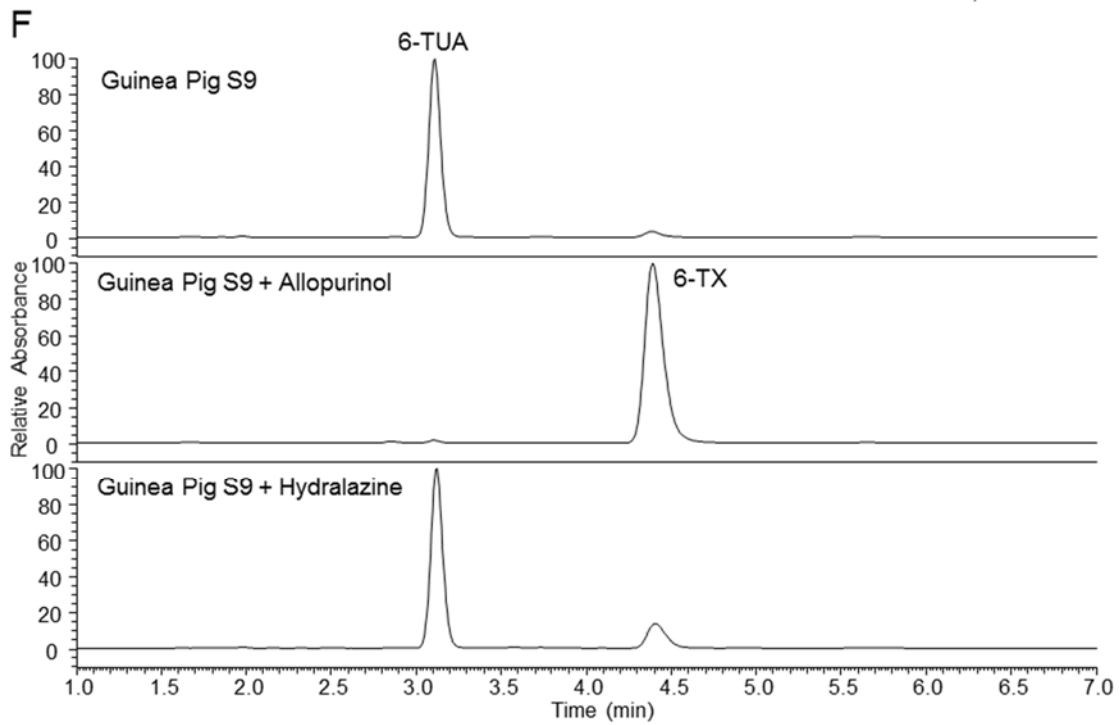

UV 340 nm, 354 nm

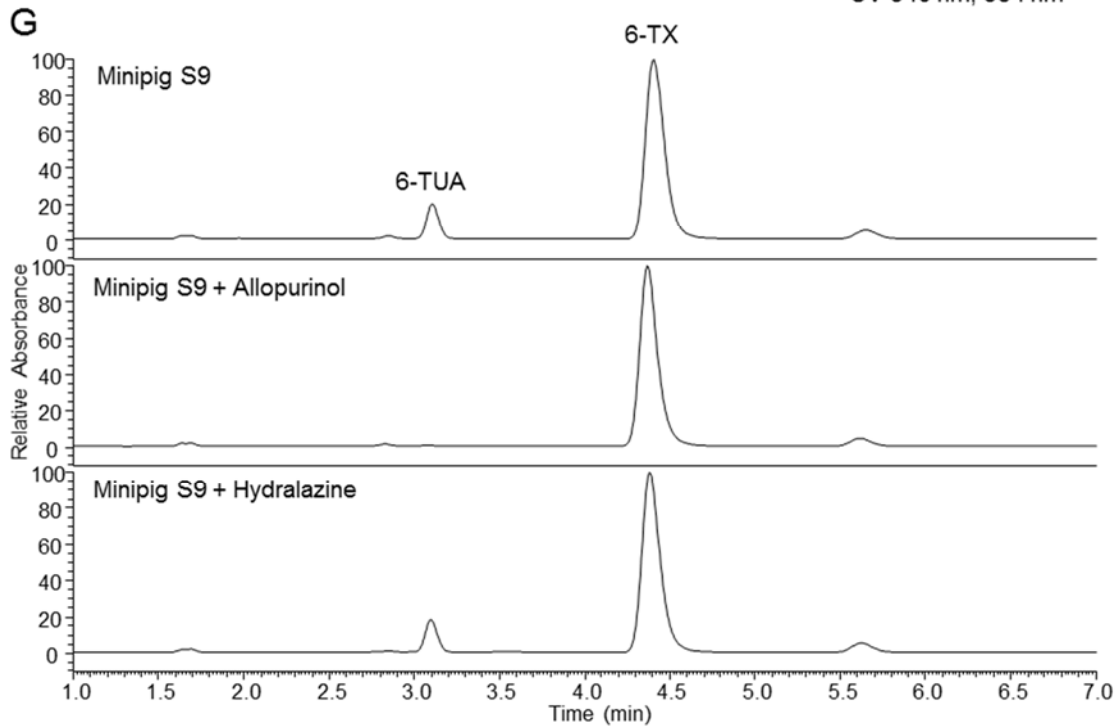

**Supplemental Table 2.**

Percent total UV peak area of parent drug (6-TX) and metabolite (6-TUA) from biotransformation experiments (Supplemental Figure 5) with 6-TX (20  $\mu$ M) in hepatic S9 of multiple species (2 mg/mL) in the presence or absence of the XO inhibitor allopurinol (100  $\mu$ M) or the AO inhibitor hydralazine (50  $\mu$ M). 6-TX, 6-thioxanthine; 6-TUA, 6-thiouric acid

|                   |         | 6-TX  | 6-TUA  |
|-------------------|---------|-------|--------|
| <b>Human</b>      | Control | 95.7% | 4.3%   |
|                   | Allo    | 99.4% | 0.6%   |
|                   | Hyd     | 96.1% | 3.9%   |
| <b>Cynomolgus</b> | Control | 27.5% | 72.5%  |
|                   | Allo    | 99.3% | 0.7%   |
|                   | Hyd     | 57.5% | 42.5%  |
| <b>Rhesus</b>     | Control | 5.7%  | 94.3%  |
|                   | Allo    | 99.2% | 0.8%   |
|                   | Hyd     | 26.1% | 73.9%  |
| <b>Rat</b>        | Control | ND    | 100.0% |
|                   | Allo    | 98.2% | 1.8%   |
|                   | Hyd     | ND    | 100.0% |
| <b>Mouse</b>      | Control | ND    | 100.0% |
|                   | Allo    | 99.6% | 0.4%   |
|                   | Hyd     | ND    | 100.0% |
| <b>Guinea Pig</b> | Control | 4.2%  | 95.8%  |
|                   | Allo    | 99.1% | 0.9%   |
|                   | Hyd     | 17.6% | 82.4%  |
| <b>Minipig</b>    | Control | 88.9% | 11.1%  |
|                   | Allo    | 99.7% | 0.3%   |
|                   | Hyd     | 89.5% | 10.5%  |

ND = not detected
